# Supplementary material for: Anti-CAR-engineered T cells for epitope-based elimination of autologous CAR T cells
Source: Cancer Immunol Immunother. 2019 Aug 14;68(9):1401–15. doi: 10.1007/s00262-019-02376-y (PMC6768917; doi:10.1007/s00262-019-02376-y)
Supplement: Supplementary file 1 — Supplementary material 1 (PDF 885 kb) [file 262_2019_2376_MOESM1_ESM.pdf]

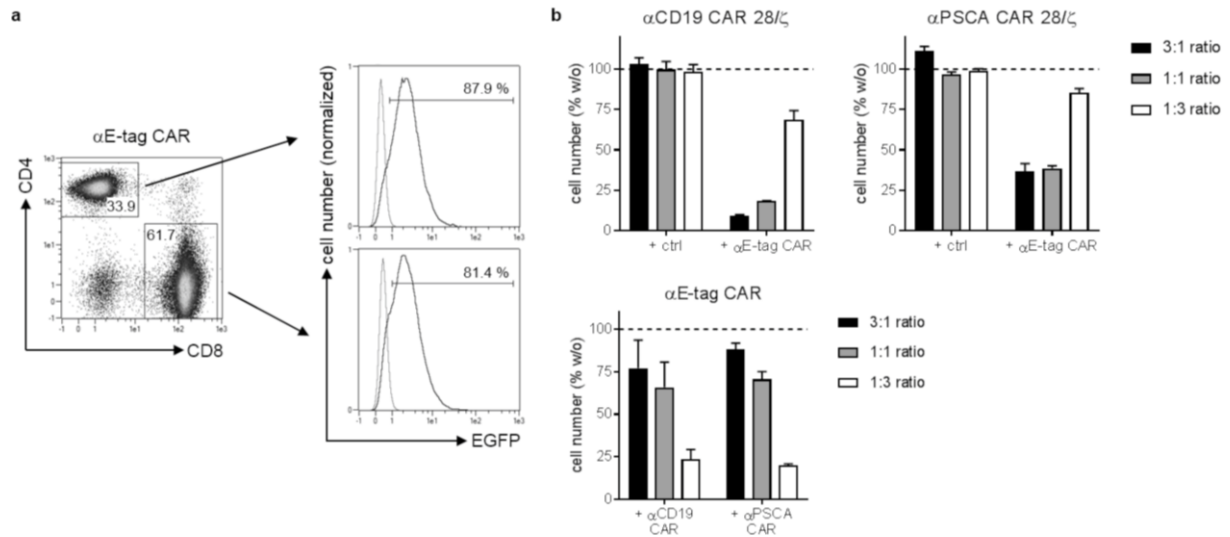

**Supplementary Figure 1**  $\alpha$ E-tag CAR T cells induce killing of E-tagged CAR target cells. **a** Transduction efficiency of  $\alpha$ E-tag CAR T cells was assessed by analysis of co-translated EGFP marker protein. Histograms show percentage of EGFP<sup>+</sup>CD4<sup>+</sup> (upper panel) and EGFP<sup>+</sup>CD8<sup>+</sup> (lower panel) T cells. Non-transduced T cells (grey graph) served as negative control. Staining example of one out of four different T cell donors is shown. **b** E-tagged CD19- or PSCA-specific CAR T cells were cultured with  $\alpha$ E-tag CAR effector or mock-transduced T cells (+ ctrl) at indicated ratios. Cell number of  $\alpha$ CD19 (n=2, upper left panel) or  $\alpha$ PSCA (n=1, upper right panel) target T cells as well as  $\alpha$ E-tag CAR effector T cells (lower panel) was measured after 24h. Absolute T cell numbers cultured alone were set to 100% and relative cell number in the presence of effector/target cells was calculated

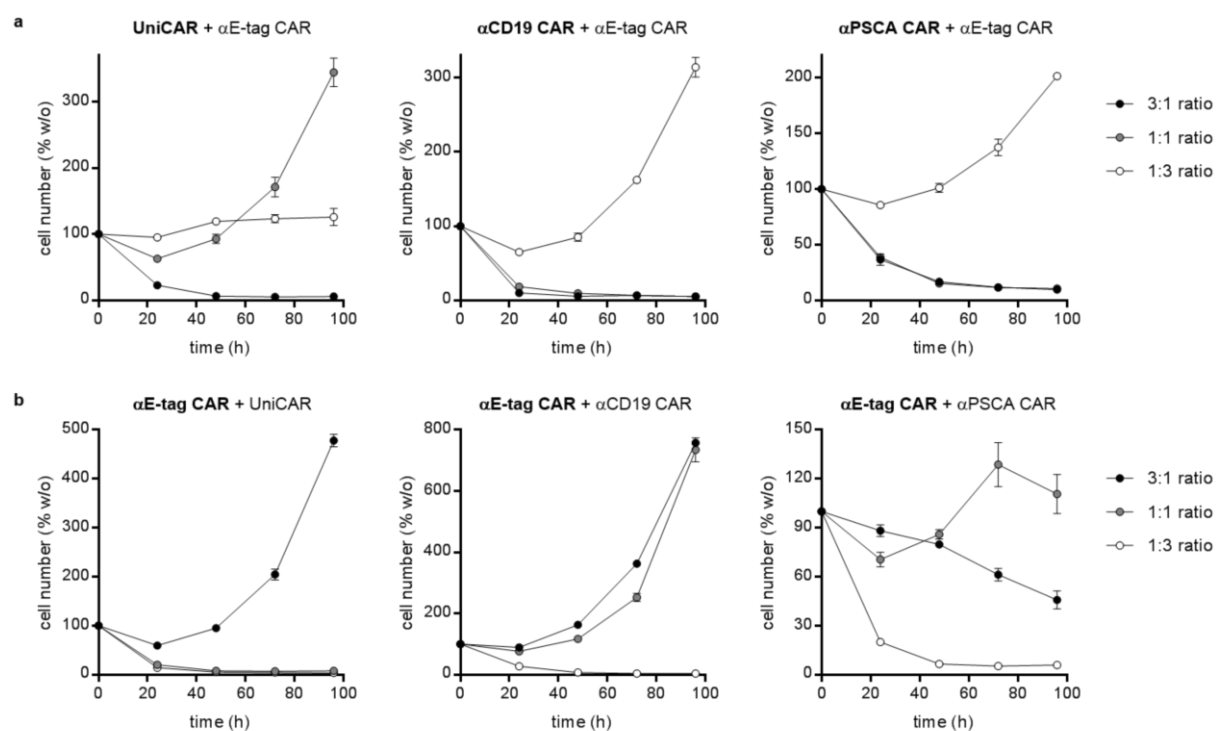

**Supplementary Figure 2** Long-term monitoring of target and effector CAR T cell numbers in cocultures. In a flow cytometry-based cytotoxicity assay,  $\alpha$ E-tag CAR effector T cells were incubated with T cells expressing different E-tagged CAR constructs (UniCAR,  $\alpha$ CD19 CAR,  $\alpha$ PSCA CAR) at indicated E:T ratios. Absolute numbers of T cells cultured alone were equalized to 100% and corresponding percentage of **a** target cells or **b** effector cells in cocultures was calculated. Results for triplicates of one out of two representative donors are shown

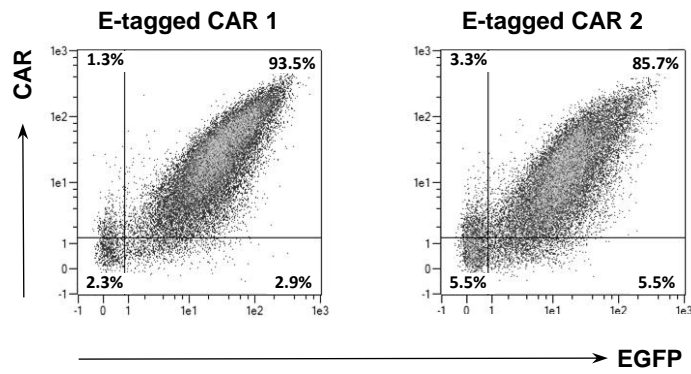

**Supplementary Figure 3** Correlation of EGFP and CAR expression of genetically modified T cells. Cells were stained with an  $\alpha$ E-tag mAb and a secondary goat anti-mouse IgG F(ab')<sub>2</sub>-PE Ab to verify surface expression of the E-tagged CAR. CAR surface expression is plotted against co-translated EGFP marker protein. Data of one representative donor are shown

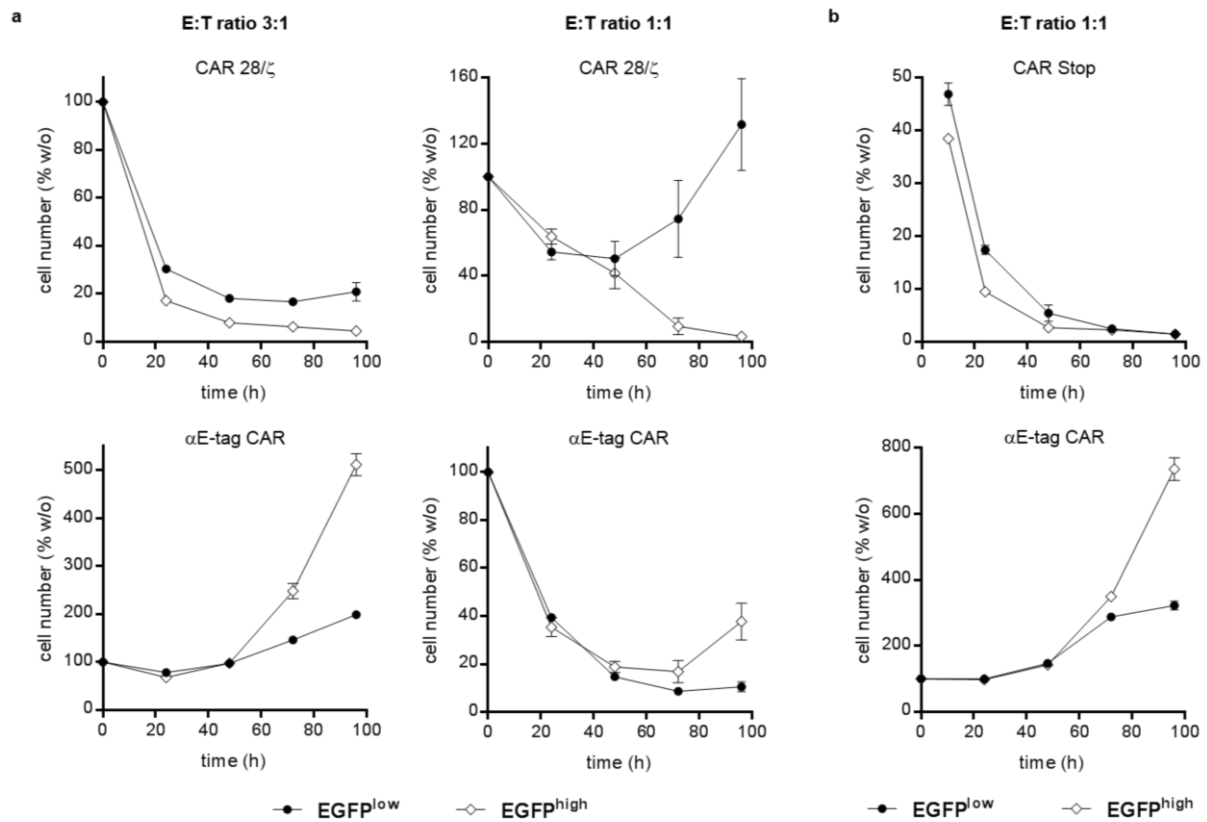

**Supplementary Figure 4** Improved killing of E-tagged target T cells expressing high CAR levels. One week after transduction, E-tagged **a** CAR 28/ζ T cells or **b** CAR Stop T cells lacking the intracellular signaling domain were sorted for EGFP<sup>low</sup> or EGFP<sup>high</sup> expressing cells. Over 4 days, target (upper row) and αE-tag CAR effector (lower row) T cells were cocultured and repeatedly quantified by flow cytometry. Absolute number of T cells cultured alone was set to 100% and corresponding percentage of cells in coculture with effector/target cells was calculated. Results for triplicates of one representative donor are depicted

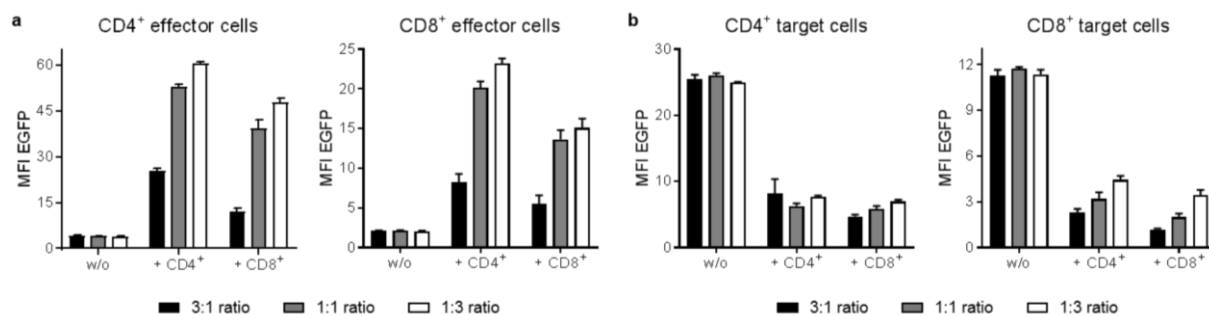

**Supplementary Figure 5** Changes in CAR expression levels of CD4<sup>+</sup> and CD8<sup>+</sup> effector and target T cells. Both CD4<sup>+</sup> and CD8<sup>+</sup> T cells were engrafted with an  $\alpha$ E-tag CAR (effector cells) or an E-tag-containing CAR Stop (target cells). After two days of coculture at indicated ratios, median EGFP signal as surrogate for CAR expression of **a** EGFP<sup>+</sup>eFluor<sup>TM</sup>450<sup>-</sup> effector and **b** EGFP<sup>+</sup>eFluor<sup>TM</sup>450<sup>+</sup> target cells was assessed by flow cytometry. Results are shown for triplicates of one representative donor

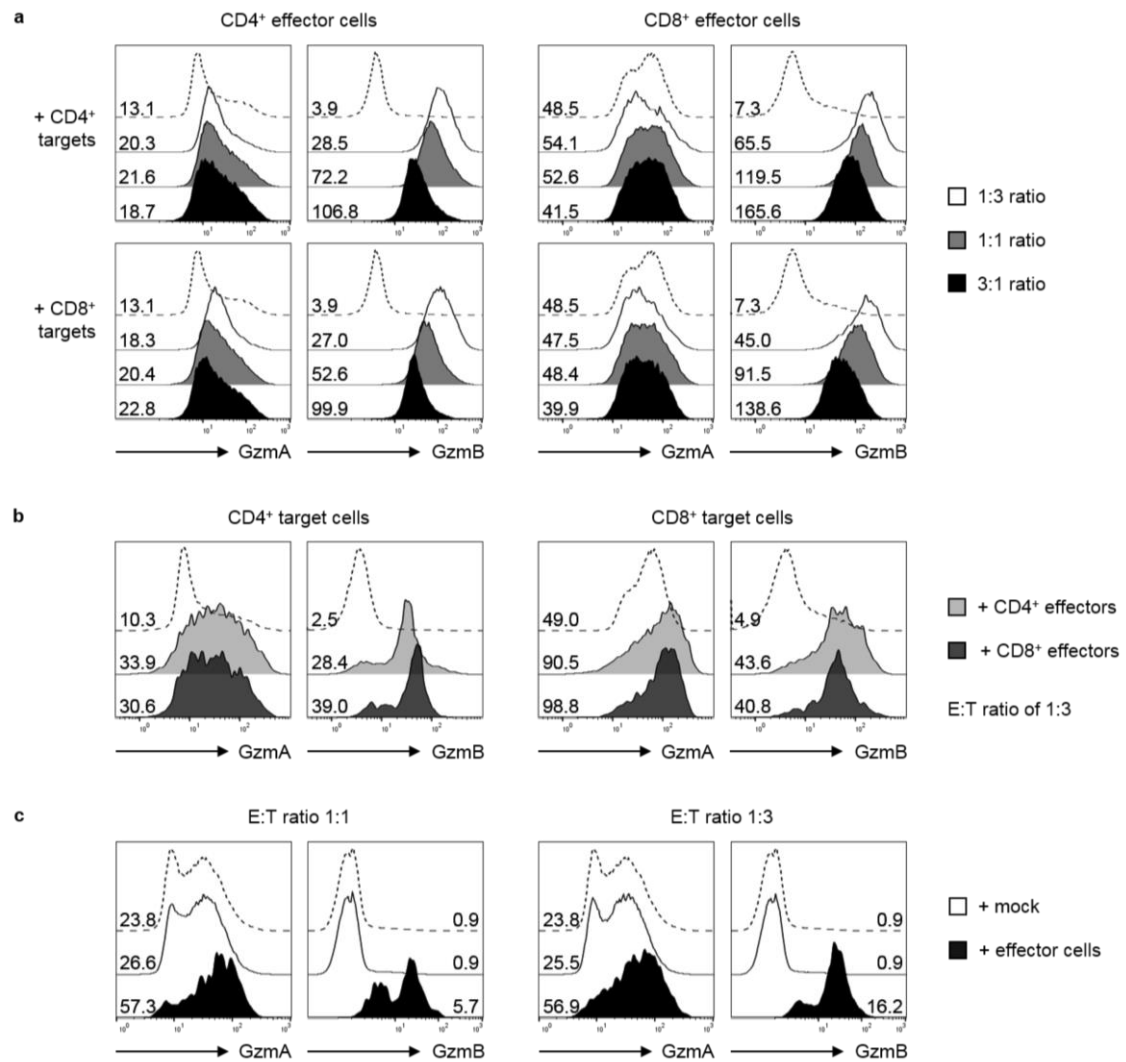

**Supplementary Figure 6** Upregulation of granzyme expression by  $\alpha$ E-tag CAR-activated T cells. Both CD4<sup>+</sup> and CD8<sup>+</sup> T cell subpopulations were genetically modified to express an  $\alpha$ E-tag CAR (effector cells) or an E-tagged CAR Stop (target cells). After 48h of coculture at indicated ratios, intracellular GzmA and GzmB expression of **a** EGFP<sup>+</sup>eFluor<sup>TM</sup>450<sup>-</sup> effector and **b** EGFP<sup>+</sup>eFluor<sup>TM</sup>450<sup>+</sup> target cells was measured by flow cytometry. **c** E-tag comprising CAR Stop T cells were incubated with  $\alpha$ E-tag CAR effector or mock-transduced control T cells. Intracellular GzmA and GzmB levels of eFluor<sup>TM</sup>450-labeled target cells were detected two days later. **a-c** T cells cultured alone (dashed line) were used to assess baseline granzyme expression levels. Numbers represent MFI of total cells for each condition. Results for one representative donor are depicted

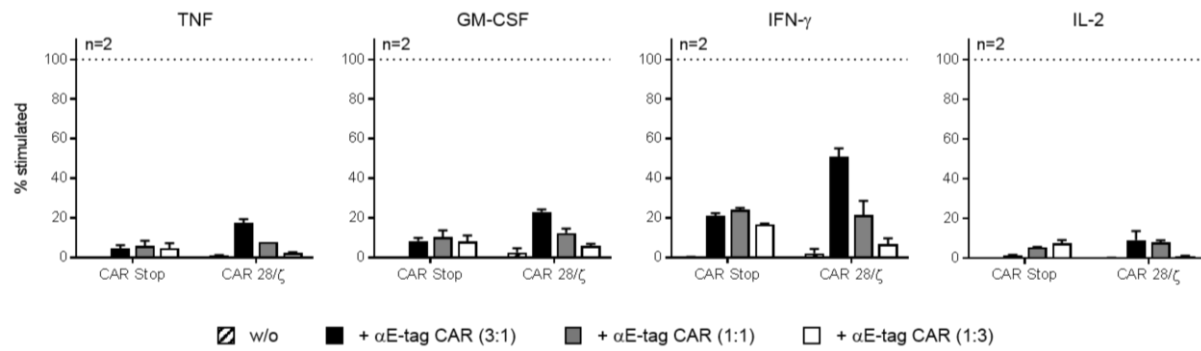

**Supplementary Figure 7** Cytokine secretion by E-tag-redredirected  $\alpha$ CAR effector T cells. For stimulation of  $\alpha$ E-tag CAR cells, cocultures at indicated E:T ratios with E-tagged CAR target cells either lacking (CAR Stop) or comprising (CAR 28/ζ) an intracellular signaling domain were performed. Concentration of TNF, GM-CSF, IFN- $\gamma$ , and IL 2 secreted within 72h of coculture was assessed by ELISA. Detected cytokine levels were normalized to cytokine production of tumor cell-redredirected, autologous CAR 28/ζ target T cells. Summarized data of two independent donors are depicted as mean  $\pm$  SD
